# Supplementary material for: まちづくり条例の意義と課題--「地域の合理性」に着目して (特集 地方分権に伴う自治体独自の土地利用規制)
Source: MDPI journal article supplement (doi:10.3390/biomedicines10040893), 2010-01-01
Supplement: s1 [file s1]

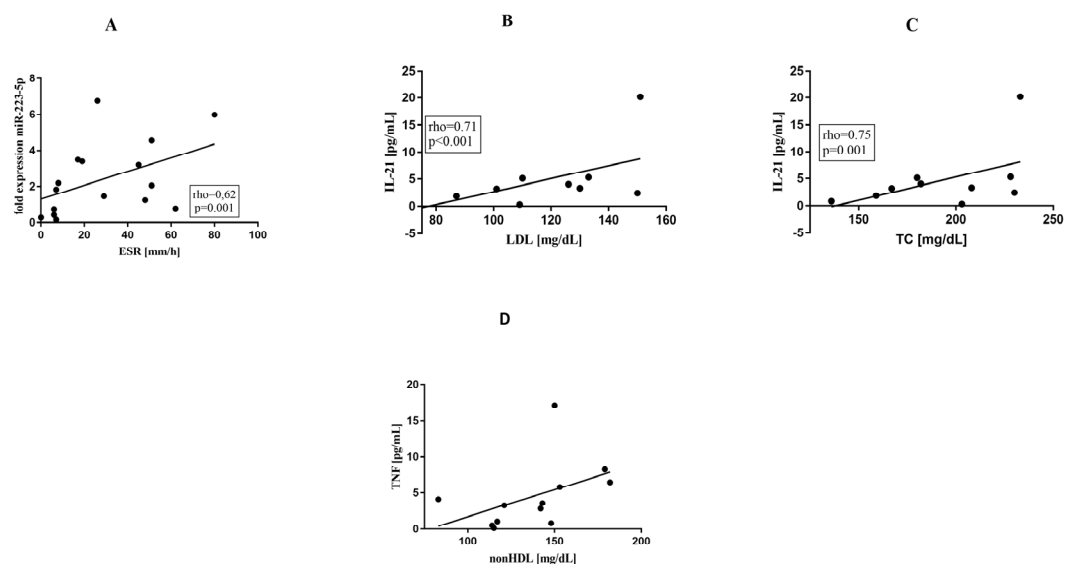

Supplementary Figure S1. Correlation analyses in PsA (A) and RA (B-D) group of patients.

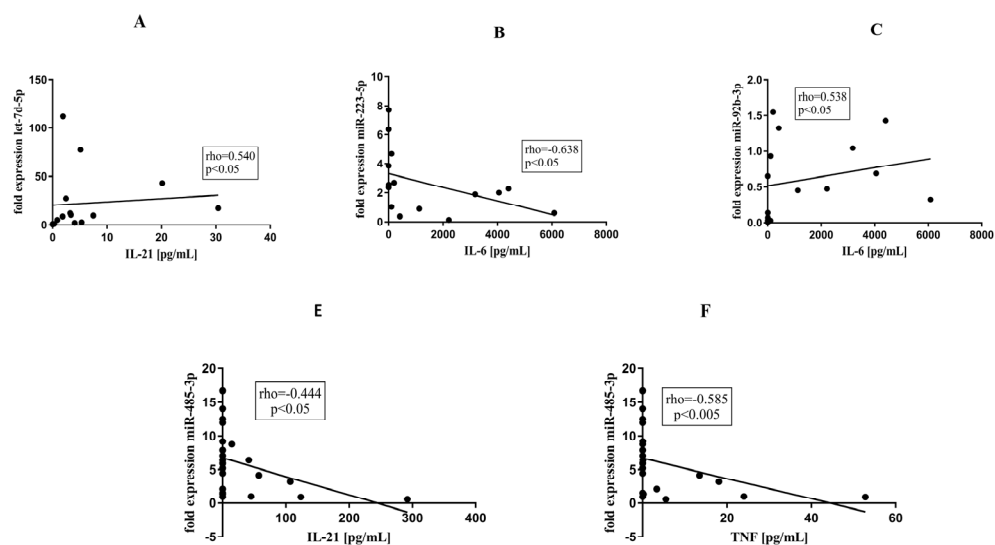

Supplementary Figure S2. Correlation analyses of serum cytokine levels with miR expression in RA group of patients (A-C) and AS group of patients (E-F).

| Variables          | AUC         | Standardized error | P           | Confidence Intervals |             | Threshold   |
|--------------------|-------------|--------------------|-------------|----------------------|-------------|-------------|
|                    |             |                    |             | Lower Bound          | Upper Bound |             |
| <b>mir485-3</b>    | <b>0,65</b> | <b>0,08</b>        | <b>0,05</b> | <b>0,50</b>          | <b>0,80</b> | <b>1,00</b> |
| mir92              | 0,64        | 0,08               | 0,09        | 0,48                 | 0,81        |             |
| <b>miR26-a-2-3</b> | <b>0,82</b> | <b>0,07</b>        | <b>0,00</b> | <b>0,68</b>          | <b>0,95</b> | <b>6,00</b> |
| miR10-b-5p         | 0,66        | 0,10               | 0,11        | 0,47                 | 0,85        |             |
| mir146-3-p         | 0,66        | 0,09               | 0,10        | 0,47                 | 0,84        |             |
| mir-233            | 0,60        | 0,09               | 0,25        | 0,43                 | 0,78        |             |
| mir-222            | 0,41        | 0,08               | 0,29        | 0,25                 | 0,58        |             |
| mir-let7d          | 0,51        | 0,09               | 0,92        | 0,34                 | 0,68        |             |

Table S1A ROC curves for miRs distinguishing PsA

| Variables          | AUC         | Standardized error | P           | Confidence Intervals |             | Threshold   |
|--------------------|-------------|--------------------|-------------|----------------------|-------------|-------------|
|                    |             |                    |             | Lower Bound          | Upper Bound |             |
| <b>mir485-3</b>    | <b>0,72</b> | <b>0,06</b>        | <b>0,00</b> | <b>0,60</b>          | <b>0,84</b> | <b>5,10</b> |
| mir92              | 0,50        | 0,07               | 0,96        | 0,36                 | 0,65        |             |
| <b>miR26-a-2-3</b> | <b>0,66</b> | <b>0,06</b>        | <b>0,01</b> | <b>0,54</b>          | <b>0,79</b> | <b>2,10</b> |
| miR10-b-5p         | 0,62        | 0,06               | 0,06        | 0,49                 | 0,75        |             |
| mir146-3-p         | 0,47        | 0,07               | 0,68        | 0,34                 | 0,61        |             |
| mir-233            | 0,47        | 0,07               | 0,64        | 0,33                 | 0,60        |             |
| mir-222            | 0,60        | 0,07               | 0,15        | 0,46                 | 0,73        |             |
| mir-let7d          | 0,40        | 0,07               | 0,11        | 0,27                 | 0,52        |             |

Table S1B ROC curves for miRs distinguishing AS

| Variables   | AUC  | Standardized error | P    | Confidence Intervals |             | Threshold |
|-------------|------|--------------------|------|----------------------|-------------|-----------|
|             |      |                    |      | Lower Bound          | Upper Bound |           |
| mir485-3    | 0,47 | 0,08               | 0,69 | 0,32                 | 0,62        |           |
| mir92       | 0,31 | 0,08               | 0,02 | 0,15                 | 0,46        |           |
| miR26-a-2-3 | 0,37 | 0,07               | 0,07 | 0,22                 | 0,51        |           |
| miR10-b-5p  | 0,27 | 0,08               | 0,01 | 0,11                 | 0,43        |           |

|                   |             |             |             |             |             |             |
|-------------------|-------------|-------------|-------------|-------------|-------------|-------------|
| <b>mir146-3-p</b> | <b>0,65</b> | <b>0,07</b> | <b>0,03</b> | <b>0,51</b> | <b>0,79</b> | <b>1,20</b> |
| mir-233           | 0,58        | 0,09        | 0,39        | 0,40        | 0,75        |             |
| mir-222           | 0,62        | 0,09        | 0,16        | 0,45        | 0,79        |             |
| <b>mir-let7d</b>  | <b>0,81</b> | <b>0,07</b> | <b>0,00</b> | <b>0,67</b> | <b>0,96</b> | <b>8,1</b>  |

Table S1C ROC curves for miRs distinguishing RA
